TITLE: The PRMT7-dependent methylation of shank2 modulates invasion-proliferation switching during breast cancer metastasis

Author: Yingqi Liu, Xiaoqing Liu, Lingxia Liu, Yibo Wang, Lu Peng, Jiayuan Liu, Lingling Li, Lian Zhang, Guannan Wang, Honghuan Li, Dongxu Liu, Baiqu Huang, Jun Lu, Yu Zhang

The authors have withdrawn their manuscript whilst they perform additional experiments to test some of their conclusions further. Therefore, the authors do not wish this work to be cited as reference for the project. If you have any questions, please contact the corresponding author.
